# Supplementary material for: 体育授業と内発的動機づけ (第5分科会 学校スポーツ教育)
Source: Royal Society of Chemistry journal article supplement (doi:10.1039/c3fo60666j), 2000-01-01
Supplement: c3fo60666j1.pdf [file c3fo60666j1.pdf]

**Supplemental Table 1.** Subjective daily gastrointestinal intolerance symptoms for 3-week treatment periods.

| Item†                       | Treatment (g agave inulin/d)* |                   |                   |     |                    |                    |                    |     |                   |                   |                    |     | P value<br>Treatment*Week |
|-----------------------------|-------------------------------|-------------------|-------------------|-----|--------------------|--------------------|--------------------|-----|-------------------|-------------------|--------------------|-----|---------------------------|
|                             | 0                             |                   |                   |     | 5.0                |                    |                    |     | 7.5               |                   |                    |     |                           |
|                             | W1                            | W2                | W3                | SEM | W1                 | W2                 | W3                 | SEM | W1                | W2                | W3                 | SEM |                           |
| Abdominal pain <sup>d</sup> | 0.1                           | 0.1               | 0.1               | 0.1 | 0.2                | 0.2                | 0.1                | 0.1 | 0.2               | 0.2               | 0.2                | 0.1 | 0.033                     |
| Bloating <sup>e</sup>       | 0.1                           | 0.2               | 0.2               | 0.1 | 0.4                | 0.4                | 0.3                | 0.1 | 0.5               | 0.4               | 0.4                | 0.1 | 0.190                     |
| Burping                     | 0.1                           | 0.1               | 0.1               | 0.1 | 0.2                | 0.2                | 0.2                | 0.1 | 0.2               | 0.2               | 0.2                | 0.1 | 0.080                     |
| Flatulence <sup>f</sup>     | 0.6 <sup>a</sup>              | 0.6 <sup>a</sup>  | 0.6 <sup>a</sup>  | 0.1 | 1.1 <sup>cb</sup>  | 1.2 <sup>c</sup>   | 0.9 <sup>b</sup>   | 0.1 | 1.3 <sup>c</sup>  | 1.3 <sup>c</sup>  | 1.2 <sup>cb</sup>  | 0.1 | 0.004                     |
| Nausea                      | 0.06 <sup>ab</sup>            | 0.02 <sup>a</sup> | 0.02 <sup>a</sup> | 0.0 | 0.08 <sup>ab</sup> | 0.08 <sup>ab</sup> | 0.04 <sup>ab</sup> | 0.0 | 0.05 <sup>a</sup> | 0.14 <sup>b</sup> | 0.11 <sup>ab</sup> | 0.0 | 0.005                     |
| Reflux                      | 0.0                           | 0.1               | 0.0               | 0.0 | 0.1                | 0.1                | 0.0                | 0.0 | 0.0               | 0.0               | 0.0                | 0.0 | 0.031                     |
| Rumblings <sup>g</sup>      | 0.2                           | 0.2               | 0.2               | 0.1 | 0.4                | 0.4                | 0.3                | 0.0 | 0.5               | 0.4               | 0.3                | 0.1 | 0.079                     |

\*Values are least squares means with pooled SEM, n=29. W1, week 1; W2, week 2; W3, week 3.

†Gastrointestinal symptoms were scored using the following scale: 0=absent, 1=mild, 2=moderate, 3=severe.

<sup>a,b</sup> Mean values in a row with unlike superscript letters differ (P<0.05).

<sup>d</sup>For means pooled for diet, 7.5 g/d > 0 g/d; 0 g/d = 5.0 g/d; 5.0 g/d = 7.5 g/d (P=0.0225). Refer to Table 3.

<sup>e</sup>For means pooled for diet, 7.5 g/d = 5.0 g/d > 0 g/d (P=0.0007). Refer to Table 3.

<sup>f</sup>For means pooled for diet, 7.5 g/d = 5.0 g/d > 0 g/d (P<0.0001). Refer to Table 3.

<sup>g</sup>For means pooled for diet, 7.5 g/d > 0 g/d; 0 g/d = 5.0 g/d; 5.0 g/d = 7.5 g/d (P=0.0085). Refer to Table 3.

**Supplemental Table 2.** Subjective weekly gastrointestinal intolerance symptoms by week within each 3-week treatment period.

|                               | Treatment (g agave inulin/day)* |     |     |     |     |     |     |     |     |     |     |     | P value |
|-------------------------------|---------------------------------|-----|-----|-----|-----|-----|-----|-----|-----|-----|-----|-----|---------|
|                               | 0                               |     |     |     | 5.0 |     |     |     | 7.5 |     |     |     |         |
|                               | W1                              | W2  | W3  | SEM | W1  | W2  | W3  | SEM | W1  | W2  | W3  | SEM |         |
| <i>Frequency</i> <sup>†</sup> |                                 |     |     |     |     |     |     |     |     |     |     |     |         |
| Abdominal Pain                | 0.1                             | 0.1 | 0.0 | 0.1 | 0.2 | 0.3 | 0.1 | 0.1 | 0.3 | 0.2 | 0.3 | 0.1 | 0.185   |
| Bloating <sup>d</sup>         | 0.1                             | 0.0 | 0.2 | 0.1 | 0.4 | 0.4 | 0.4 | 0.1 | 0.5 | 0.5 | 0.5 | 0.1 | 0.812   |
| Flatulence <sup>e</sup>       | 0.1                             | 0.1 | 0.0 | 0.1 | 0.8 | 0.8 | 0.7 | 0.1 | 1.1 | 1.1 | 0.9 | 0.1 | 0.734   |
| Nausea                        | 0.0                             | 0.1 | 0.0 | 0.1 | 0.2 | 0.3 | 0.1 | 0.1 | 0.1 | 0.2 | 0.2 | 0.1 | 0.365   |
| Rumblings <sup>f</sup>        | 0.1                             | 0.1 | 0.0 | 0.1 | 0.5 | 0.3 | 0.3 | 0.1 | 0.5 | 0.5 | 0.3 | 0.1 | 0.502   |
| Diarrhea                      | 0.0                             | 0.0 | 0.0 | 0.0 | 0.0 | 0.0 | 0.0 | 0.0 | 0.0 | 0.0 | 0.2 | 0.0 | 0.208   |

\*Values are least squares means with pooled SEM, n=29. W1, week 1; W2, week 2; W3, week 3.

<sup>†</sup>Adults were asked if they experienced any of the gastrointestinal symptoms listed above during the past 7 days (Yes or No). If yes, frequency of gastrointestinal symptoms was scored using the following scale: 0=no more than usual, 1=somewhat more than usual, or 2=much more than usual.

<sup>d</sup>For means pooled for diet, 7.5 g/d = 5.0 g/d > 0 g/d (P=0.0004). Refer to Table 3.

<sup>e</sup>For means pooled for diet, 7.5 g/d = 5.0 g/d > 0 g/d (P<0.0001). Refer to Table 3.

<sup>f</sup>For means pooled for diet, 7.5 g/d = 5.0 g/d > 0 g/d (P=0.0026). Refer to Table 3.

**Supplemental Table 3.** Frequency of GI symptom ratings for healthy adult human participants consuming 0, 5.0, or 7.5 g agave inulin/day.

| Item                      | Treatment<br>(g agave inulin/d)    |            |            |
|---------------------------|------------------------------------|------------|------------|
|                           | 0                                  | 5.0        | 7.5        |
| <b>Nausea</b>             | ----- Number of Subjects (%) ----- |            |            |
| <i>Week 1</i>             |                                    |            |            |
| Did not experience        | 28 (96.6%)                         | 25 (86.2%) | 24 (82.8%) |
| No more than usual        | 1 (3.4 %)                          | 0 (0.0%)   | 2 (6.9%)   |
| Somewhat more than usual  | 0 (0.0%)                           | 3 (10.3%)  | 3 (10.3%)  |
| Much more than usual      | 0 (0.0%)                           | 1 (3.4 %)  | 0 (0.0%)   |
| <i>Week 2</i>             |                                    |            |            |
| Did not experience        | 27 (93.1%)                         | 23 (79.3%) | 24 (82.8%) |
| No more than usual        | 0 (0.0%)                           | 0 (0.0%)   | 1 (3.4 %)  |
| Somewhat more than usual  | 2 (6.9%)                           | 5 (17.2%)  | 3 (10.3%)  |
| Much more than usual      | 0 (0.0%)                           | 1 (3.4 %)  | 1 (3.4%)   |
| <i>Week 3</i>             |                                    |            |            |
| Did not experience        | 28 (96.6%)                         | 25 (86.2%) | 24 (82.8%) |
| No more than usual        | 0 (0.0%)                           | 1 (3.4 %)  | 1 (3.4%)   |
| Somewhat more than usual  | 1 (3.4 %)                          | 3 (10.3%)  | 2 (6.9%)   |
| Much more than usual      | 0 (0.0%)                           | 0 (0.0%)   | 2 (6.9%)   |
| <i>All weeks combined</i> |                                    |            |            |
| Did not experience        | 83 (95.4%)                         | 73 (83.9%) | 72 (82.8%) |
| No more than usual        | 1 (1.1%)                           | 1 (1.1%)   | 4 (4.6%)   |
| Somewhat more than usual  | 3 (3.4%)                           | 11 (12.6%) | 8 (9.2%)   |
| Much more than usual      | 0 (0.0%)                           | 2 (2.3%)   | 3 (3.4%)   |
| <b>Bloating</b>           |                                    |            |            |
| <i>Week 1</i>             |                                    |            |            |
| Did not experience        | 23 (79.3%)                         | 17 (58.6%) | 13 (44.8%) |
| No more than usual        | 4 (13.8%)                          | 2 (6.9%)   | 5 (17.2%)  |
| Somewhat more than usual  | 2 (6.9%)                           | 9 (31.0%)  | 8 (27.6%)  |
| Much more than usual      | 0 (0.0%)                           | 1 (3.4 %)  | 3 (10.3%)  |
| <i>Week 2</i>             |                                    |            |            |
| Did not experience        | 21 (72.4%)                         | 17 (58.6%) | 13 (44.8%) |
| No more than usual        | 7 (24.1%)                          | 3 (10.3%)  | 5 (17.2%)  |
| Somewhat more than usual  | 1 (3.4 %)                          | 7 (24.1%)  | 8 (27.6%)  |
| Much more than usual      | 0 (0.0%)                           | 2 (6.9%)   | 3 (10.3%)  |
| <i>Week 3</i>             |                                    |            |            |
| Did not experience        | 21 (72.4%)                         | 16 (55.2%) | 13 (44.8%) |
| No more than usual        | 3 (10.3%)                          | 2 (6.9%)   | 5 (17.2%)  |
| Somewhat more than usual  | 5 (17.2%)                          | 10 (34.5%) | 9 (31.0%)  |
| Much more than usual      | 0 (0.0%)                           | 1 (3.4 %)  | 2 (6.9%)   |
| <i>All weeks combined</i> |                                    |            |            |
| Did not experience        | 65 (74.7%)                         | 50 (57.5%) | 39 (44.8%) |
| No more than usual        | 14 (16.1%)                         | 7 (8.0%)   | 15 (17.2%) |
| Somewhat more than usual  | 8 (9.2%)                           | 26 (29.9%) | 25 (28.7%) |

|                           |            |            |            |
|---------------------------|------------|------------|------------|
| Much more than usual      | 0 (0.0%)   | 4 (4.6%)   | 8 (9.2%)   |
| <b>GI Rumbling</b>        |            |            |            |
| <i>Week 1</i>             |            |            |            |
| Did not experience        | 19 (65.5%) | 14 (48.3%) | 11 (37.9%) |
| No more than usual        | 8 (27.6%)  | 5 (17.2%)  | 5 (17.2%)  |
| Somewhat more than usual  | 2 (6.9%)   | 7 (24.1%)  | 11 (37.9%) |
| Much more than usual      | 0 (0.0%)   | 3 (10.3%)  | 2 (6.9%)   |
| <i>Week 2</i>             |            |            |            |
| Did not experience        | 17 (58.6%) | 13 (44.8%) | 12 (41.4%) |
| No more than usual        | 10 (34.5%) | 8 (27.6%)  | 7 (24.1%)  |
| Somewhat more than usual  | 2 (6.9%)   | 7 (24.1%)  | 6 (20.7%)  |
| Much more than usual      | 0 (0.0%)   | 1 (3.4%)   | 4 (13.8%)  |
| <i>Week 3</i>             |            |            |            |
| Did not experience        | 18 (62.1%) | 14 (48.3%) | 13 (44.8%) |
| No more than usual        | 10 (34.5%) | 8 (27.6%)  | 10 (34.5%) |
| Somewhat more than usual  | 1 (3.4%)   | 6 (20.7%)  | 3 (10.3%)  |
| Much more than usual      | 0 (0.0%)   | 1 (3.4%)   | 3 (10.3%)  |
| <i>All weeks combined</i> |            |            |            |
| Did not experience        | 54 (62.1%) | 41 (47.1%) | 36 (41.4%) |
| No more than usual        | 28 (32.2%) | 21 (24.1%) | 22 (25.3%) |
| Somewhat more than usual  | 5 (5.7%)   | 20 (23.0%) | 20 (23.0%) |
| Much more than usual      | 0 (0.0%)   | 5 (5.7%)   | 9 (10.3%)  |
| <b>Gas/Flatulence</b>     |            |            |            |
| <i>Week 1</i>             |            |            |            |
| Did not experience        | 4 (13.8%)  | 3 (10.3%)  | 1 (3.4%)   |
| No more than usual        | 22 (75.9%) | 9 (31.0%)  | 7 (24.1%)  |
| Somewhat more than usual  | 3 (10.3%)  | 11 (37.9%) | 11 (37.9%) |
| Much more than usual      | 0 (0.0%)   | 6 (20.7%)  | 10 (34.5%) |
| <i>Week 2</i>             |            |            |            |
| Did not experience        | 7 (24.1%)  | 2 (6.9%)   | 3 (10.3%)  |
| No more than usual        | 19 (65.5%) | 10 (34.5%) | 4 (13.8%)  |
| Somewhat more than usual  | 3 (10.3%)  | 10 (34.5%) | 11 (37.9%) |
| Much more than usual      | 0 (0.0%)   | 7 (24.1%)  | 11 (37.9%) |
| <i>Week 3</i>             |            |            |            |
| Did not experience        | 5 (17.2%)  | 3 (10.3%)  | 2 (6.9%)   |
| No more than usual        | 23 (79.3%) | 11 (37.9%) | 8 (27.6%)  |
| Somewhat more than usual  | 1 (3.4%)   | 10 (34.5%) | 13 (44.8%) |
| Much more than usual      | 0 (0.0%)   | 5 (17.2%)  | 6 (20.7%)  |
| <i>All weeks combined</i> |            |            |            |
| Did not experience        | 16 (18.4%) | 8 (9.2%)   | 6 (6.9%)   |
| No more than usual        | 64 (73.6%) | 30 (34.5%) | 19 (21.8%) |
| Somewhat more than usual  | 7 (8.0%)   | 31 (35.6%) | 35 (40.2%) |
| Much more than usual      | 0 (0.0%)   | 18 (20.7%) | 27 (31.0%) |
| <b>Abdominal Pain</b>     |            |            |            |
| <i>Week 1</i>             |            |            |            |
| Did not experience        | 27 (93.1%) | 24 (82.8%) | 20 (69.0%) |
| No more than usual        | 1 (3.4%)   | 0 (0.0%)   | 1 (3.4%)   |
| Somewhat more than usual  | 0 (0.0%)   | 4 (13.8%)  | 8 (27.6%)  |
| Much more than usual      | 1 (3.4%)   | 1 (3.4%)   | 0 (0.0%)   |

*Week 2*

|                          |            |            |            |
|--------------------------|------------|------------|------------|
| Did not experience       | 24 (82.8%) | 24 (82.8%) | 25 (86.2%) |
| No more than usual       | 3 (10.3%)  | 0 (0.0%)   | 0 (0.0%)   |
| Somewhat more than usual | 1 (3.4 %)  | 3 (10.3%)  | 3 (10.3%)  |
| Much more than usual     | 1 (3.4 %)  | 2 (6.9%)   | 1 (3.4 %)  |

*Week 3*

|                          |            |            |            |
|--------------------------|------------|------------|------------|
| Did not experience       | 26 (89.7%) | 24 (82.8%) | 22 (75.9%) |
| No more than usual       | 2 (6.9%)   | 1 (3.4 %)  | 0 (0.0%)   |
| Somewhat more than usual | 1 (3.4 %)  | 4 (13.8%)  | 4 (13.8%)  |
| Much more than usual     | 0 (0.0%)   | 0 (0.0%)   | 3 (10.3%)  |

*All weeks combined*

|                          |            |            |            |
|--------------------------|------------|------------|------------|
| Did not experience       | 77 (88.5%) | 72 (82.8%) | 67 (77.0%) |
| No more than usual       | 6 (6.9%)   | 1 (1.1%)   | 1 (1.1%)   |
| Somewhat more than usual | 2 (2.3%)   | 11 (12.6%) | 15 (17.2)  |
| Much more than usual     | 2 (2.3%)   | 3 (3.4%)   | 4 (4.6%)   |

**Diarrhea***Week 1*

|                          |            |            |            |
|--------------------------|------------|------------|------------|
| Did not experience       | 28 (96.6%) | 28 (96.6%) | 28 (96.6%) |
| No more than usual       | 0 (0.0%)   | 1 (3.4 %)  | 0 (0.0%)   |
| Somewhat more than usual | 1 (3.4 %)  | 0 (0.0%)   | 1 (3.4 %)  |
| Much more than usual     | 0 (0.0%)   | 0 (0.0%)   | 0 (0.0%)   |

*Week 2*

|                          |            |            |            |
|--------------------------|------------|------------|------------|
| Did not experience       | 28 (96.6%) | 27 (93.1%) | 27 (93.1%) |
| No more than usual       | 1 (3.4 %)  | 1 (3.4 %)  | 1 (3.4 %)  |
| Somewhat more than usual | 0 (0.0%)   | 1 (3.4 %)  | 1 (3.4 %)  |
| Much more than usual     | 0 (0.0%)   | 0 (0.0%)   | 0 (0.0%)   |

*Week 3*

|                          |            |            |            |
|--------------------------|------------|------------|------------|
| Did not experience       | 28 (96.6%) | 28 (96.6%) | 23 (79.3%) |
| No more than usual       | 0 (0.0%)   | 0 (0.0%)   | 2 (6.9%)   |
| Somewhat more than usual | 1 (3.4 %)  | 1 (3.4 %)  | 3 (10.3%)  |
| Much more than usual     | 0 (0.0%)   | 0 (0.0%)   | 1 (3.4 %)  |

*All weeks combined*

|                          |            |            |            |
|--------------------------|------------|------------|------------|
| Did not experience       | 84 (96.6%) | 83 (95.4%) | 78 (89.7%) |
| No more than usual       | 1 (1.1%)   | 2 (2.3%)   | 3 (3.4%)   |
| Somewhat more than usual | 2 (2.3%)   | 2 (2.3%)   | 5 (5.7%)   |
| Much more than usual     | 0 (0.0%)   | 0 (0.0%)   | 1 (1.1%)   |

---
